# Supplementary material for: Effect of Lockdowns on Hospital Staff in a COVID Center: A Retrospective Observational Study
Source: MDPI journal article supplement (doi:10.3390/vaccines10111847), 2022-10-31

### Staff population and PPE supply according to risk stratification and availability

|                                                                                         | 01.03.2020-31.03.2020                                                                                  | 01.04.2020-05.11.2020                                                                    | 06.11.2020-31.12.2021                                                          | 01.01.2022-09.02.2022                                                          |
|-----------------------------------------------------------------------------------------|--------------------------------------------------------------------------------------------------------|------------------------------------------------------------------------------------------|--------------------------------------------------------------------------------|--------------------------------------------------------------------------------|
| Healthcare Workers<br>(medical staff, nurses,<br>allied health professions)             | <b>COVID DEPTs:</b><br>Surgical mask +<br>Contact and droplet PPE                                      | <b>COVID DEPTs:</b><br>Surgical mask OR FFP2 mask +<br>Contact and droplet PPE           | <b>COVID DEPTs:</b><br>FFP2 mask +<br>Contact and droplet PPE                  | <b>COVID DEPTs:</b><br>FFP2 mask +<br>Contact and droplet PPE                  |
|                                                                                         | <b>Other DEPTs:</b><br>Standard measures<br>(social distancing, hand hygiene, etc.)                    | <b>Aerosol-producing procedures:</b><br>FFP2 mask or higher +<br>Contact and droplet PPE | <b>Aerosol-producing procedures:</b><br>FFP3 mask +<br>Contact and droplet PPE | <b>Aerosol-producing procedures:</b><br>FFP3 mask +<br>Contact and droplet PPE |
|                                                                                         |                                                                                                        | <b>Other DEPTs:</b><br>Surgical mask +<br>Standard measures                              | <b>Other DEPTs:</b><br>Surgical mask* +<br>Standard measures                   | <b>Other DEPTs:</b><br>FFP2 +<br>Standard measures                             |
| Administrative staff<br>Support staff<br>Other (carpenters, cafeteria<br>workers, etc.) | Standard measures<br>(social distancing, hand hygiene, etc.,<br>including smart working if applicable) | Surgical mask +<br>Standard measures                                                     | Surgical mask +<br>Standard measures                                           | Surgical mask +<br>Standard measures                                           |

\* FFP2 mask in case of performing swabs or in case of ascertained clusters

### Staff population distribution according to their role (percentages are calculated over the period 01.03.2020-09.02.2022)

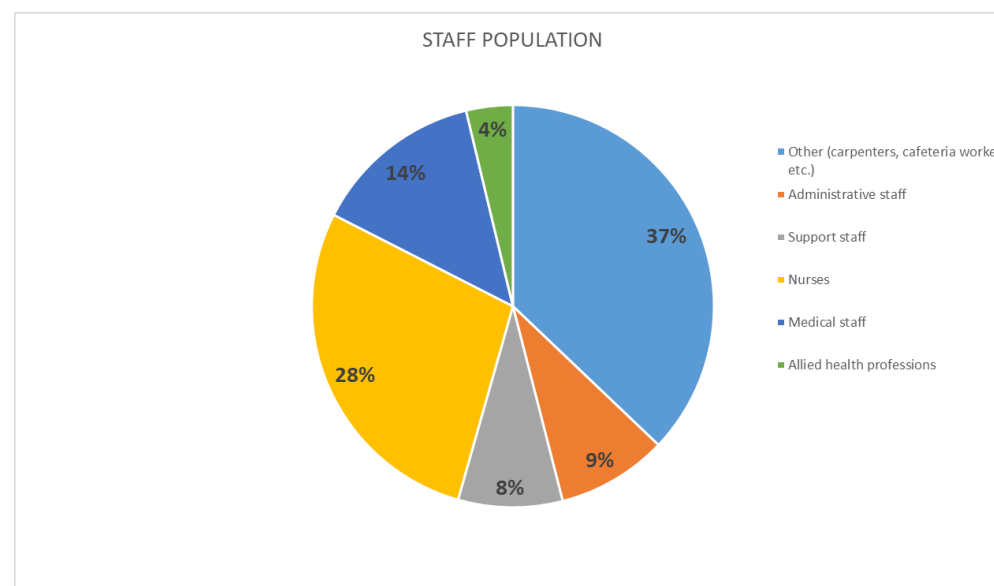

Supplement: s1 [file s1]
